# Supplementary material for: Isolation and Characterization of a Lytic Vibrio parahaemolyticus Phage vB_VpaP_GHSM17 from Sewage Samples
Source: MDPI journal article supplement (doi:10.3390/v14081601), 2022-07-22

**Table S1.** ORFs function analysis of phage vB\_VpaP\_GHSM17.

| <b>Coding<br/>DNA<br/>Sequence</b> | <b>Start</b> | <b>Stop</b> | <b>Len.<br/>(bp)</b> | <b>Annotation</b>                       | <b>Functional Group</b> |
|------------------------------------|--------------|-------------|----------------------|-----------------------------------------|-------------------------|
| CDS-1                              | 307          | 663         | 357                  | hypothetical protein                    |                         |
| CDS-2                              | 656          | 1069        | 414                  | peptidase M15A                          | Lysis                   |
| CDS-3                              | 1078         | 1632        | 555                  | hypothetical protein                    |                         |
| CDS-4                              | 1632         | 2246        | 615                  | bacterial Ig-like domain family protein | Additional functions    |
| CDS-5                              | 2255         | 2554        | 300                  | hypothetical protein                    |                         |
| CDS-6                              | 2659         | 4578        | 1,920                | terminase large subunit                 | DNA packaging           |
| CDS-7                              | 4589         | 4888        | 300                  | DNA maturase A                          | DNA metabolism          |
| CDS-8                              | 4898         | 7630        | 2,733                | glycosyl hydrolase                      | Lysis                   |
| CDS-9                              | 7639         | 8250        | 612                  | tail fibers protein                     | Structure               |
| CDS-10                             | 8271         | 12125       | 3,855                | internal core protein                   | Structure               |
| CDS-11                             | 12176        | 13303       | 1,128                | hypothetical protein                    |                         |
| CDS-12                             | 13288        | 14931       | 1,644                | internal virion protein                 | Structure               |
| CDS-13                             | 14941        | 15690       | 750                  | hypothetical protein                    |                         |
| CDS-14                             | 15700        | 18045       | 2,346                | tail tubular protein B                  | Structure               |
| CDS-15                             | 18055        | 18615       | 561                  | tail tubular protein A                  | Structure               |
| CDS-16                             | 18681        | 18809       | 129                  | hypothetical protein                    |                         |
| CDS-17                             | 18821        | 19819       | 999                  | major capsid protein                    | Structure               |
| CDS-18                             | 19885        | 20700       | 816                  | scaffolding protein                     | Structure               |
| CDS-19                             | 20700        | 22232       | 1,533                | head-tail connector protein             | Structure               |
| CDS-20                             | 22241        | 22486       | 246                  | hypothetical protein                    |                         |
| CDS-21                             | 22473        | 22892       | 420                  | GNAT family N-acetyltransferase         | Additional functions    |
| CDS-22                             | 22924        | 25374       | 2,451                | RNA polymerase                          | DNA metabolism          |
| CDS-23                             | 25563        | 26147       | 585                  | ATP-binding protein                     | Additional functions    |
| CDS-24                             | 26144        | 26263       | 120                  | hypothetical protein                    |                         |
| CDS-25                             | 26263        | 26703       | 441                  | Endonuclease                            | DNA metabolism          |
| CDS-26                             | 26690        | 26896       | 207                  | hypothetical protein                    |                         |
| CDS-27                             | 26883        | 27833       | 951                  | Exonuclease                             | DNA metabolism          |
| CDS-28                             | 27836        | 28261       | 426                  | hypothetical protein                    |                         |
| CDS-29                             | 28271        | 28480       | 210                  | hypothetical protein                    |                         |
| CDS-30                             | 28480        | 29109       | 630                  | Pyrophosphatase                         | Additional functions    |
| CDS-31                             | 29121        | 29453       | 333                  | hypothetical protein                    |                         |
| CDS-32                             | 29499        | 30314       | 816                  | hypothetical protein                    |                         |
| CDS-33                             | 30516        | 31112       | 597                  | hypothetical protein                    |                         |
| CDS-34                             | 31121        | 31696       | 576                  | hypothetical protein                    |                         |
| CDS-35                             | 31712        | 34138       | 2427                 | DNA polymerase                          | DNA metabolism          |
| CDS-36                             | 34131        | 34364       | 234                  | DNA helicase                            | DNA metabolism          |
| CDS-37                             | 34364        | 35644       | 1,281                | putative DNA helicase                   | DNA metabolism          |

|        |       |       |       |                      |                |
|--------|-------|-------|-------|----------------------|----------------|
| CDS-38 | 35626 | 36438 | 813   | putative primase     | DNA metabolism |
| CDS-39 | 36628 | 37731 | 1,104 | hypothetical protein |                |
| CDS-40 | 37757 | 39898 | 2,142 | hypothetical protein |                |
| CDS-41 | 39928 | 40344 | 417   | hypothetical protein |                |
| CDS-42 | 40331 | 40588 | 258   | hypothetical protein |                |
| CDS-43 | 40590 | 40739 | 150   | hypothetical protein |                |
| CDS-44 | 40748 | 41044 | 297   | hypothetical protein |                |
| CDS-45 | 41044 | 41580 | 537   | hypothetical protein |                |

---

**Table S2.** The results of the genome sequence alignment of phage vB\_VpaP\_GHSM17.

| Scientific Name           | Family                   | Genus             | Score  | Q.C.<br>(%) | E. | P.I.<br>(%) | A.L.<br>(bp) | Accession   |
|---------------------------|--------------------------|-------------------|--------|-------------|----|-------------|--------------|-------------|
| Vibrio phage vB_VpaP_KF2  | <i>Autographiviridae</i> | <i>Maculvirus</i> | 67,774 | 99          | 0  | 94.82       | 43,571       | NC_048036.1 |
| Vibrio phage vB_VpP_NS8   | <i>Autographiviridae</i> | <i>Maculvirus</i> | 65,826 | 98          | 0  | 94.32       | 43,252       | MZ592921.1  |
| Vibrio phage BUCT233      | <i>Autographiviridae</i> | <i>Maculvirus</i> | 66,417 | 99          | 0  | 94.12       | 43,245       | MZ020222.1  |
| Vibrio phage vB_Vc_SrVc2  | <i>Autographiviridae</i> | <i>Maculvirus</i> | 61,792 | 97          | 0  | 93.92       | 43,157       | MW331544.1  |
| Vibrio phage vB_Vc_SrVc9  | <i>Autographiviridae</i> | <i>Maculvirus</i> | 61,765 | 97          | 0  | 93.91       | 43,156       | LR794124.1  |
| Vibrio phage vB_VpP_DE10  | <i>Autographiviridae</i> | <i>Maculvirus</i> | 64,670 | 97          | 0  | 93.37       | 42,871       | MZ516827.1  |
| Vibrio phage vB_VpP_FE11  | <i>Autographiviridae</i> | <i>Maculvirus</i> | 65,334 | 99          | 0  | 93.33       | 43,397       | MT178448.1  |
| Vibrio phage vB_VpP_DE17  | <i>Autographiviridae</i> | <i>Maculvirus</i> | 65,383 | 99          | 0  | 93.31       | 43,394       | MW250641.1  |
| Vibrio phage vB_VpaP_MGD1 | <i>Autographiviridae</i> | <i>Maculvirus</i> | 64,239 | 98          | 0  | 92.44       | 43,290       | MT501516.1  |
| Vibrio phage VP93         | <i>Autographiviridae</i> | <i>Maculvirus</i> | 61,397 | 97          | 0  | 92.37       | 43,931       | FJ896200.1  |
| Vibrio phage vB_VpaP_KF1  | <i>Autographiviridae</i> | <i>Maculvirus</i> | 67,538 | 99          | 0  | 92.23       | 43,237       | NC_048035.1 |
| Vibrio phage OWB          | <i>Autographiviridae</i> | <i>Maculvirus</i> | 56,579 | 98          | 0  | 88.57       | 43,264       | MN974282.1  |
| Vibrio phage vB_VpaS_OWB  | <i>Autographiviridae</i> | <i>Maculvirus</i> | 56,579 | 98          | 0  | 88.57       | 43,264       | NC_048167.1 |

**Table S3.** All *Vibrio* phages in family *Autographiviridae*.

| Scientific Name                        | Family                   | Genus/<br>Subfamily      | Len.<br>(bp) | Accession   |
|----------------------------------------|--------------------------|--------------------------|--------------|-------------|
| Vibrio phage vB_VhaP_VH-5              | <i>Autographiviridae</i> | <i>Beijerinckvirinae</i> | 42,485       | MN497414.1  |
| Vibrio phage Vc1                       | <i>Autographiviridae</i> | <i>Colwellvirinae</i>    | 44,541       | KJ502657.1  |
| Vibrio phage 15E36.1                   | <i>Autographiviridae</i> | <i>Colwellvirinae</i>    | 45,211       | MW865291.1  |
| Vibrio phage phi-A318                  | <i>Autographiviridae</i> | <i>Colwellvirinae</i>    | 42,544       | KF322026.1  |
| Vibrio phage AS51                      | <i>Autographiviridae</i> | <i>Colwellvirinae</i>    | 42,542       | KF800937.1  |
| Vibrio phage Vp670                     | <i>Autographiviridae</i> | <i>Colwellvirinae</i>    | 43,121       | KY290756.1  |
| Vibrio phage vB_VpaP_MGD2              | <i>Autographiviridae</i> | <i>Colwellvirinae</i>    | 45,105       | MK820013.2  |
| Vibrio phage VP-HS15                   | <i>Autographiviridae</i> | <i>Colwellvirinae</i>    | 46,759       | MN807240.1  |
| Vibrio phage VEN                       | <i>Autographiviridae</i> | <i>Colwellvirinae</i>    | 44,603       | MG545917.1  |
| Vibrio phage VP505                     | <i>Autographiviridae</i> | <i>Colwellvirinae</i>    | 43,009       | MW451247.1  |
| Vibrio phage<br>1.204.O_10N.222.46.F12 | <i>Autographiviridae</i> | <i>Cyclitvirus</i>       | 44,168       | MG592574.1  |
| Vibrio phage BUCT233                   | <i>Autographiviridae</i> | <i>Maculvirus</i>        | 43,245       | MZ020222.1  |
| Vibrio phage OWB                       | <i>Autographiviridae</i> | <i>Maculvirus</i>        | 43,264       | MN974282.1  |
| Vibrio phage vB_Vc_SrVc2               | <i>Autographiviridae</i> | <i>Maculvirus</i>        | 43,157       | MW331544.1  |
| Vibrio phage vB_Vc_SrVc9               | <i>Autographiviridae</i> | <i>Maculvirus</i>        | 43,156       | LR794124.1  |
| Vibrio<br>phage<br>vB_VpaP_GHSM17      | <i>Autographiviridae</i> | <i>Maculvirus</i>        | 43,228       | OM362522    |
| Vibrio phage vB_VpaP_KF1               | <i>Autographiviridae</i> | <i>Maculvirus</i>        | 43,237       | NC_048035.1 |
| Vibrio phage vB_VpaP_KF2               | <i>Autographiviridae</i> | <i>Maculvirus</i>        | 43,571       | NC_048036.1 |
| Vibrio phage vB_VpaP_MGD1              | <i>Autographiviridae</i> | <i>Maculvirus</i>        | 43,290       | MT501516.1  |
| Vibrio phage vB_VpaS_OWB               | <i>Autographiviridae</i> | <i>Maculvirus</i>        | 43,264       | NC_048167.1 |
| Vibrio phage vB_VpP_DE10               | <i>Autographiviridae</i> | <i>Maculvirus</i>        | 42,871       | MZ516827.1  |
| Vibrio phage vB_VpP_DE17               | <i>Autographiviridae</i> | <i>Maculvirus</i>        | 43,394       | MW250641.1  |
| Vibrio phage vB_VpP_FE11               | <i>Autographiviridae</i> | <i>Maculvirus</i>        | 43,397       | MT178448.1  |
| Vibrio phage vB_VpP_NS8                | <i>Autographiviridae</i> | <i>Maculvirus</i>        | 43,252       | MZ592921.1  |
| Vibrio phage VP93                      | <i>Autographiviridae</i> | <i>Maculvirus</i>        | 43,931       | FJ896200.1  |
| Vibrio phage vB_VpP_G1                 | <i>Autographiviridae</i> | <i>Melnykovirinae</i>    | 43,859       | MZ592920.1  |
| Vibrio phage ICP3                      | <i>Autographiviridae</i> | <i>Studiervirinae</i>    | 39,162       | HQ641340.1  |
| Vibrio phage N4                        | <i>Autographiviridae</i> | <i>Studiervirinae</i>    | 38,497       | FJ409640.1  |
| Vibrio phage VP4                       | <i>Autographiviridae</i> | <i>Studiervirinae</i>    | 39,503       | DQ029335.1  |
| Vibrio phage ICP3_2007_A               | <i>Autographiviridae</i> | <i>Studiervirinae</i>    | 39,088       | HQ641344.1  |
| Vibrio phage ICP3_2008_A               | <i>Autographiviridae</i> | <i>Studiervirinae</i>    | 39,349       | HQ641343.1  |
| Vibrio phage ICP3_2009_A               | <i>Autographiviridae</i> | <i>Studiervirinae</i>    | 38,983       | HQ641342.1  |
| Vibrio phage ICP3_2009_B               | <i>Autographiviridae</i> | <i>Studiervirinae</i>    | 39,042       | HQ641341.1  |
| Vibrio phage JSF11                     | <i>Autographiviridae</i> | <i>Studiervirinae</i>    | 39,341       | KY883641.1  |
| Vibrio phage JSF18                     | <i>Autographiviridae</i> | <i>Studiervirinae</i>    | 38,570       | KY883650.1  |
| Vibrio phage JSF20                     | <i>Autographiviridae</i> | <i>Studiervirinae</i>    | 39,378       | KY883651.1  |
| Vibrio phage JSF24                     | <i>Autographiviridae</i> | <i>Studiervirinae</i>    | 39,378       | KY883652.1  |
| Vibrio phage JSF25                     | <i>Autographiviridae</i> | <i>Studiervirinae</i>    | 38,593       | MF574151.1  |

|                        |                          |                       |        |            |
|------------------------|--------------------------|-----------------------|--------|------------|
| Vibrio phage JSF28     | <i>Autographiviridae</i> | <i>Studiervirinae</i> | 38,489 | KY883643.1 |
| Vibrio phage JSF30     | <i>Autographiviridae</i> | <i>Studiervirinae</i> | 38,056 | KY883644.1 |
| Vibrio phage JSF31     | <i>Autographiviridae</i> | <i>Studiervirinae</i> | 38,581 | KY883645.1 |
| Vibrio phage JSF32     | <i>Autographiviridae</i> | <i>Studiervirinae</i> | 38,581 | KY883646.1 |
| Vibrio phage JSF34     | <i>Autographiviridae</i> | <i>Studiervirinae</i> | 39,378 | KY883653.1 |
| Vibrio phage JSF35     | <i>Autographiviridae</i> | <i>Studiervirinae</i> | 38,688 | KY883648.1 |
| Vibrio phage JSF36     | <i>Autographiviridae</i> | <i>Studiervirinae</i> | 38,581 | KY883649.1 |
| Vibrio phage JSF37     | <i>Autographiviridae</i> | <i>Studiervirinae</i> | 38,451 | MT215167.1 |
| Vibrio phage Rostov 13 | <i>Autographiviridae</i> | <i>Studiervirinae</i> | 36,326 | OK169295.1 |
| Vibrio phage Rostov-1  | <i>Autographiviridae</i> | <i>Studiervirinae</i> | 37,247 | MG957431.1 |
| Vibrio phage VP3       | <i>Autographiviridae</i> | <i>Studiervirinae</i> | 39,481 | JQ780163.1 |
| Vibrio phage JSF7      | <i>Autographiviridae</i> | <i>Tawavirus</i>      | 46,318 | KY065149.1 |
| Vibrio phage phiV141   | <i>Autographiviridae</i> | <i>Tawavirus</i>      | 43,313 | MT227925.1 |

**Figure S1.** Lysogenic validation of phage vB\_VpaP\_GHSM17.

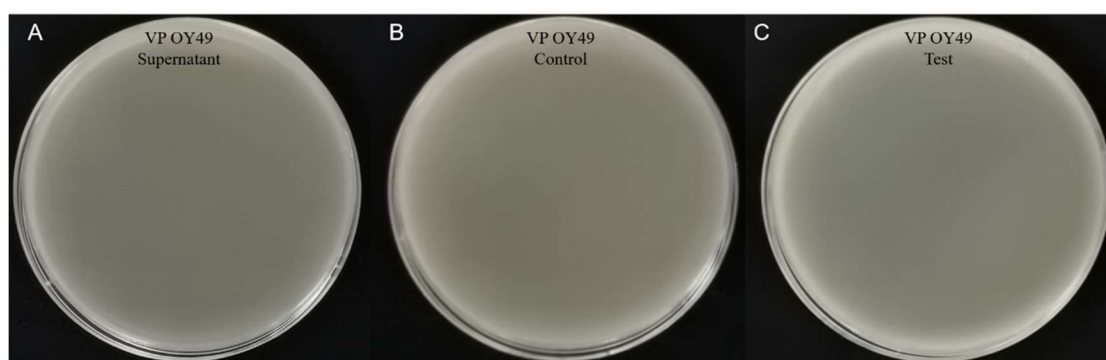

Supplement: s1 [file s1]
